# Supplementary material
Source: MDPI journal article supplement (https://www.mdpi.com/2071-1050/16/8/3458)
Supplement: s1 [file s1]

# CClimate Change Impact on the Distribution of Forest Species in the Brazilian Amazon

Ingrid Lana Lima de Moraes<sup>1</sup>, Alexandra Amaro de Lima<sup>2</sup>, Ivinne Nara Lobato dos Santos<sup>1</sup>, Carlos Meneses<sup>3</sup>, Rogério Freire da Silva<sup>3</sup>, Ricardo Lopes<sup>4</sup>, Santiago Linorio Ferreyra Ramos<sup>5</sup>, Ananda Virginia de Aguiar<sup>6</sup>, Marcos Silveira Wrege<sup>6</sup> and Maria Teresa Gomes Lopes<sup>1</sup>

## SUPPORTING INFORMATION

Additional Supporting Information may be found in the online version of this article:

**Table S1.** Coefficients of the principal components (PCS) selected by the PCAs for bioclimatic and edaphic variables together.

| Variable | PC1    | PC2    | PC3    | PC4    | PC5    | PC6    | PC7    | PC8    | PC9    | PC10   | PC11   | PC12   | PC13   | PC14   |
|----------|--------|--------|--------|--------|--------|--------|--------|--------|--------|--------|--------|--------|--------|--------|
| va_1     | -0.251 | -0.097 | 0.201  | -0.035 | 0.001  | -0.077 | 0.116  | -0.047 | 0.011  | -0.047 | 0.049  | -0.075 | 0.003  | -0.002 |
| va_2     | 0.176  | 0.040  | 0.198  | -0.086 | 0.005  | 0.004  | 0.062  | 0.076  | -0.461 | -0.182 | -0.002 | 0.155  | 0.396  | 0.365  |
| va_3     | -0.229 | 0.055  | 0.000  | 0.059  | -0.186 | 0.061  | -0.191 | -0.066 | -0.028 | -0.024 | -0.156 | -0.221 | 0.429  | 0.279  |
| va_4     | 0.243  | -0.054 | 0.001  | -0.002 | 0.229  | -0.047 | 0.226  | 0.039  | -0.005 | -0.046 | 0.186  | 0.193  | -0.094 | -0.082 |
| va_5     | -0.173 | -0.134 | 0.288  | -0.058 | 0.097  | -0.115 | 0.265  | -0.046 | -0.033 | -0.104 | 0.181  | 0.104  | 0.027  | 0.045  |
| va_6     | -0.274 | -0.068 | 0.107  | 0.003  | -0.046 | -0.045 | 0.033  | -0.071 | 0.136  | 0.008  | 0.020  | -0.104 | -0.004 | -0.023 |
| va_7     | 0.243  | -0.022 | 0.105  | -0.056 | 0.155  | -0.038 | 0.193  | 0.061  | -0.228 | -0.106 | 0.134  | 0.246  | 0.029  | 0.075  |
| va_8     | -0.212 | -0.115 | 0.232  | -0.043 | 0.051  | -0.109 | 0.180  | -0.033 | -0.110 | -0.084 | 0.011  | -0.111 | 0.035  | -0.015 |
| va_9     | -0.260 | -0.060 | 0.132  | -0.015 | -0.060 | -0.032 | 0.019  | -0.064 | 0.158  | 0.003  | 0.073  | -0.031 | -0.003 | 0.010  |
| va_10    | -0.208 | -0.139 | 0.239  | -0.039 | 0.092  | -0.111 | 0.232  | -0.050 | 0.029  | -0.071 | 0.144  | 0.000  | -0.030 | -0.030 |
| va_11    | -0.268 | -0.064 | 0.160  | -0.026 | -0.061 | -0.049 | 0.033  | -0.052 | 0.018  | -0.023 | -0.004 | -0.106 | 0.028  | 0.022  |
| va_12    | -0.250 | -0.048 | -0.170 | 0.089  | 0.105  | 0.044  | -0.041 | -0.022 | -0.147 | -0.049 | -0.040 | 0.213  | -0.022 | -0.058 |
| va_13    | -0.257 | -0.023 | -0.064 | 0.005  | -0.023 | 0.059  | -0.111 | -0.062 | -0.165 | -0.020 | -0.098 | 0.356  | -0.116 | -0.142 |
| va_14    | -0.138 | -0.055 | -0.306 | 0.197  | 0.276  | 0.013  | 0.057  | 0.069  | -0.042 | -0.074 | 0.039  | -0.118 | 0.249  | 0.133  |
| va_15    | 0.029  | 0.089  | 0.268  | -0.163 | -0.336 | 0.034  | -0.192 | -0.075 | -0.200 | -0.009 | -0.274 | 0.197  | 0.186  | -0.153 |
| va_16    | -0.258 | -0.021 | -0.069 | 0.010  | -0.013 | 0.058  | -0.104 | -0.058 | -0.173 | -0.024 | -0.092 | 0.355  | -0.123 | -0.144 |
| va_17    | -0.148 | -0.058 | -0.307 | 0.196  | 0.267  | 0.016  | 0.052  | 0.063  | -0.041 | -0.073 | 0.041  | -0.090 | 0.227  | 0.124  |
| va_18    | -0.150 | -0.081 | -0.142 | 0.043  | 0.186  | -0.011 | 0.000  | 0.115  | -0.540 | -0.141 | -0.255 | -0.249 | -0.185 | -0.304 |
| va_19    | -0.188 | -0.006 | -0.160 | 0.111  | 0.044  | 0.063  | -0.060 | -0.111 | 0.244  | 0.043  | 0.133  | 0.559  | 0.223  | 0.103  |
| va_20    | 0.030  | -0.035 | 0.212  | 0.228  | 0.133  | 0.174  | -0.312 | 0.009  | 0.144  | -0.504 | -0.056 | 0.030  | -0.303 | 0.187  |
| va_21    | -0.020 | -0.295 | -0.004 | -0.202 | -0.008 | 0.104  | -0.370 | 0.142  | -0.066 | -0.048 | 0.333  | -0.033 | -0.031 | 0.070  |
| va_22    | 0.029  | 0.197  | -0.041 | 0.222  | -0.195 | -0.051 | -0.112 | -0.336 | -0.217 | -0.190 | 0.439  | -0.145 | -0.029 | -0.062 |
| va_23    | -0.071 | 0.338  | 0.108  | 0.201  | -0.016 | 0.022  | 0.095  | 0.204  | 0.089  | -0.192 | -0.080 | 0.042  | -0.032 | -0.046 |
| va_24    | 0.134  | -0.251 | -0.028 | 0.113  | 0.054  | -0.075 | 0.045  | -0.449 | -0.001 | -0.026 | -0.268 | 0.014  | -0.137 | 0.186  |
| va_25    | -0.002 | -0.193 | -0.165 | 0.159  | -0.415 | -0.181 | 0.111  | 0.238  | -0.006 | -0.210 | -0.019 | 0.068  | -0.210 | 0.223  |
| va_26    | 0.161  | -0.066 | 0.179  | 0.202  | 0.116  | 0.048  | -0.162 | -0.073 | 0.187  | -0.441 | -0.092 | -0.021 | 0.161  | -0.184 |
| va_27    | 0.118  | -0.315 | -0.093 | 0.100  | -0.173 | -0.123 | 0.001  | 0.033  | 0.078  | -0.150 | 0.032  | 0.018  | 0.257  | -0.373 |
| va_28    | -0.016 | -0.038 | -0.137 | -0.214 | -0.138 | 0.524  | 0.293  | -0.094 | 0.044  | -0.200 | -0.004 | -0.050 | 0.005  | -0.024 |
| va_29    | -0.017 | -0.122 | 0.241  | 0.283  | 0.060  | 0.354  | -0.024 | 0.174  | -0.072 | 0.312  | -0.004 | -0.001 | -0.096 | 0.080  |
| va_30    | -0.020 | -0.315 | 0.064  | -0.161 | 0.058  | 0.190  | -0.308 | 0.178  | -0.075 | 0.105  | 0.234  | -0.044 | -0.044 | 0.054  |
| va_31    | 0.013  | 0.139  | 0.004  | 0.324  | -0.188 | 0.131  | 0.008  | -0.293 | -0.235 | 0.131  | 0.414  | -0.046 | -0.043 | -0.107 |

|       |        |        |        |        |        |        |       |        |        |        |        |        |        |        |
|-------|--------|--------|--------|--------|--------|--------|-------|--------|--------|--------|--------|--------|--------|--------|
| va_32 | -0.080 | 0.263  | 0.144  | 0.288  | -0.047 | 0.127  | 0.160 | 0.258  | 0.009  | 0.069  | -0.025 | 0.040  | 0.007  | -0.064 |
| va_33 | 0.113  | -0.256 | 0.036  | 0.199  | 0.015  | 0.047  | 0.092 | -0.381 | -0.078 | 0.207  | -0.231 | 0.005  | -0.105 | 0.229  |
| va_34 | -0.010 | -0.215 | -0.088 | 0.216  | -0.410 | -0.070 | 0.157 | 0.300  | -0.060 | -0.007 | 0.007  | 0.047  | -0.129 | 0.203  |
| va_35 | 0.078  | -0.152 | 0.249  | 0.292  | 0.091  | 0.277  | 0.025 | 0.098  | 0.008  | 0.215  | -0.065 | -0.017 | 0.155  | -0.138 |
| va_36 | 0.125  | -0.330 | -0.020 | 0.152  | -0.130 | -0.052 | 0.069 | 0.022  | 0.055  | 0.019  | -0.014 | 0.020  | 0.263  | -0.354 |
| va_37 | -0.016 | -0.037 | -0.135 | -0.214 | -0.139 | 0.524  | 0.293 | -0.094 | 0.044  | -0.200 | -0.003 | -0.051 | 0.003  | -0.026 |

---

Bioclimatic variables: va\_1= Annual Mean Temperature (°C), va\_2= Mean Diurnal Range (Mean of Monthly (maxtemp–mintemp) (°C), va\_3= Isothermality (BIO2/BIO7) (\*100) (°C), va\_4= Temperature Seasonality (standart deviation \*100) (°C), va\_5= Max Temperature of Warmerst Month (°C), va\_6= Min Temperature of Coldest month (°C), va\_7= Temperature Annual Range (BIO5-BIO6) (°C), va\_8= Mean Temperature of Wettest Quarter (°C), va\_9= Mean Temperature of Driest Quarter (°C), va\_10= Mean Temperature of Warmest Quarter (°C), va\_11= Mean Temperature of Coldest Quarter (°C), va\_12= Annual Precipitation (mm), va\_13= Precipitation of Wettest Month (mm), va\_14= Precipitation of Driest Month (mm), va\_15= Precipitation Seasonality (Coefficient of Variation) (mm), va\_16= Precipitation of Wettest Quarter (mm), va\_17= Precipitation of Driest Quarter (mm), va\_18= Precipitation of Warmest Quarter (mm), and va\_19= Precipitation of Coldest Quarter (mm). Edaphic variables of soil depth (0–20 cm): va\_20= Bulk Density (g/cm<sup>3</sup>), va\_21= Clay (%), va\_22= Coarse fragments (%), va\_23= Sand (%), va\_24= Silt (%), va\_25= Organic Carbon Content (g/kg), va\_26= pH in water, va\_27= Cation Exchange Capacity soil (cmolc/Kg), and va\_28= Probabilidade prevista de ocorrência do horizonte (%). Edaphic variables of soil depth (0–40 cm): va\_29= Bulk Density (g/cm<sup>3</sup>), va\_30= Clay (%), va\_31= Coarse fragments (%), va\_32= Sand (%), va\_33= Silt (%), va\_34= Organic Carbon Content (g/kg), va\_35= pH in water, va\_36= Cation Exchange Capacity soil (cmolc/Kg), and va\_37= Predicted probability of horizon occurrence (%).
